# Supplementary material for: Effectiveness and Evidence Level of Dance on Functioning of Children and Adolescents with Neuromotor Impairments: A Systematic Review
Source: Int J Environ Res Public Health. 2023 Jan 13;20(2):1501. doi: 10.3390/ijerph20021501 (PMC9859262; doi:10.3390/ijerph20021501)
Supplement: Supplementary file 1 [file ijerph-20-01501-s001.zip › ijerph-2026807-supplementary.pdf]

# EFFECTIVENESS AND EVIDENCE LEVEL OF DANCE ON FUNCTIONING OF CHILDREN WITH NEUROMOTOR IMPAIRMENTS: A SYSTEMATIC REVIEW

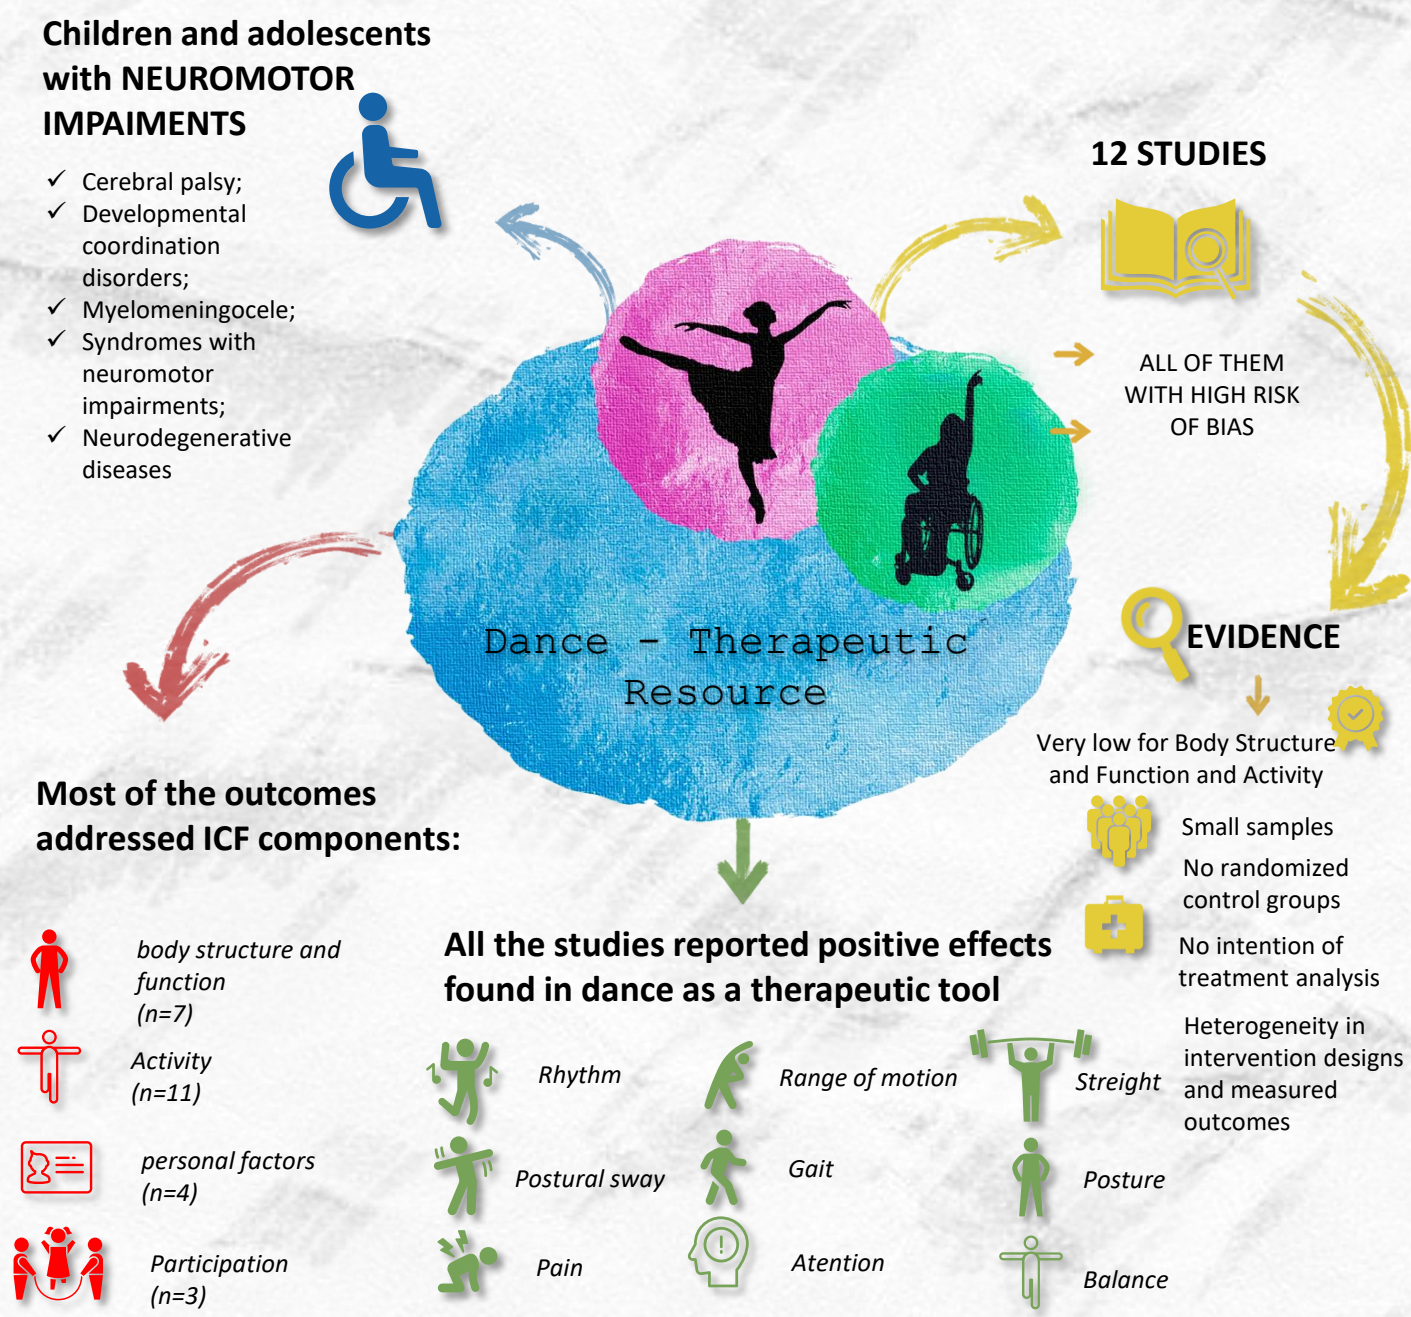

**The LOW evidence level for dance on activity and body structure and function ICF domains does not mean that dance could not be use as adjuvant rehabilitation tool with potential benefits in participation and personal factors.**

Further RCTs should assess the effects of dance in CANI using outcome measures in all components of the CIF
